# Supplementary material for: Optimising Vine Weevil, Otiorhynchus sulcatus F. (Coleoptera: Curculionidae), Monitoring Tool Design
Source: MDPI journal article supplement (doi:10.3390/insects13010080), 2022-01-12
Supplement: s1 [file s1]

## Supplementary Materials

### *Refuge colour measurements*

The painted paper cups used as refuges in this study had differences in reflectance along the visible spectrum (450–700 nm) (Supplementary figure 1). White refuges had high reflectance (90 %) at wavelengths above ~ 550 nm. In contrast, black refuges had zero or close to zero reflectance at the wavelengths measured. Yellow refuges also had high reflectance (80 %) above ~ 560 nm. The reflectance of blue refuges was 40 % between ~ 455 and 475 nm, while green refuges had a maximum spectral reflectance (50 %) between ~ 495 and 510 nm. Red refuges had high reflectance (70 %) at wavelengths above ~ 625 nm.

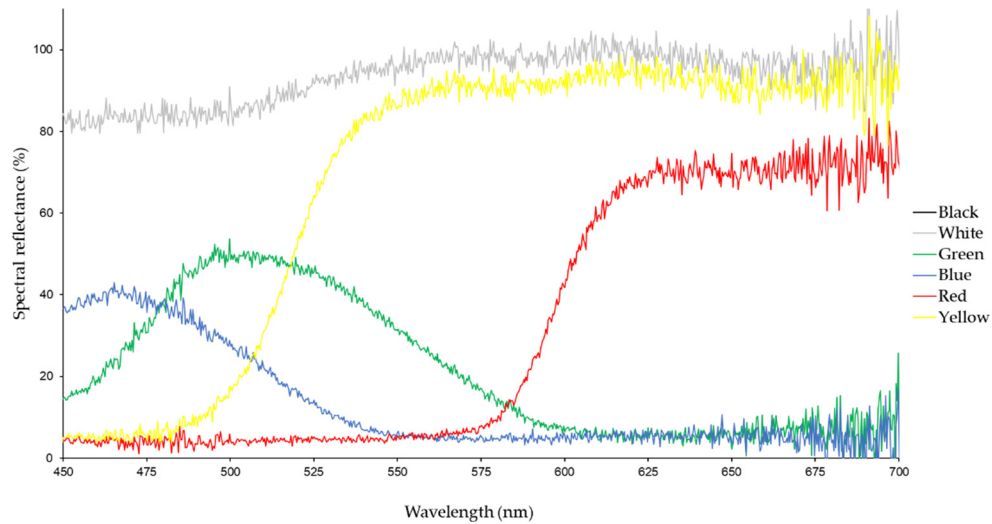

**Supplementary Figure S1.** Reflectance values from spectral analysis of coloured paper cups used in trapping experiments.

**Supplementary Table S1.** Tukey contrast comparison between coloured refuges when vine weevil adults were released individually

| Comparison     | Odds ratio | SE    | p. value |
|----------------|------------|-------|----------|
| White / Yellow | 3.13       | 3.67  | 0.93     |
| Green / Yellow | 7.98       | 8.69  | 0.398    |
| Green / White  | 2.55       | 1.84  | 0.79     |
| Black / Yellow | 13.82      | 14.74 | 0.13     |
| Black / White  | 4.42       | 3.03  | 0.25     |
| Black / Green  | 1.73       | 0.92  | 0.91     |
| Red / Yellow   | 13.82      | 14.74 | 0.13     |
| Red / White    | 4.42       | 3.03  | 0.25     |
| Red / Green    | 1.73       | 0.92  | 0.91     |
| Red / Black    | 1.00       | 0.48  | 1.00     |
| Blue / Yellow  | 23.06      | 24.31 | 0.03     |
| Blue / White   | 7.37       | 4.93  | 0.03     |
| Blue / Green   | 2.89       | 1.47  | 0.29     |
| Blue / Black   | 1.67       | 0.76  | 0.87     |
| Blue / Red     | 1.67       | 0.76  | 0.87     |

**Supplementary Table S2.** Tukey contrast comparison between coloured refuges when vine weevil adults were released in groups of 10

| Comparison     | Odds ratio | SE    | p. value |
|----------------|------------|-------|----------|
| Blue / Black   | 0.51       | 0.12  | 0.05     |
| Green / Black  | 0.44       | 0.11  | 0.01     |
| Green / Blue   | 0.86       | 0.24  | 0.99     |
| Red / Black    | 0.39       | 0.1   | 0.004    |
| Red / Blue     | 0.77       | 0.22  | 0.95     |
| Red / Green    | 0.9        | 0.27  | 0.99     |
| White / Black  | 0.12       | 0.049 | <.0001   |
| White / Blue   | 0.23       | 0.1   | 0.01     |
| White / Green  | 0.27       | 0.12  | 0.05     |
| White / Red    | 0.29       | 0.13  | 0.08     |
| Yellow / Black | 0.28       | 0.08  | 0.0002   |
| Yellow / Blue  | 0.54       | 0.17  | 0.4      |

|                |      |      |      |
|----------------|------|------|------|
| Yellow / Green | 0.63 | 0.21 | 0.74 |
| Yellow / Red   | 0.7  | 0.24 | 0.9  |
| Yellow / White | 2.37 | 1.13 | 0.46 |

**Supplementary Table S3.** Tukey contrast comparison between refuges with different heights

| Comparison      | Odds ratio | SE   | p. value |
|-----------------|------------|------|----------|
| 3 cm / 11.30 cm | 0.46       | 0.08 | <.0001   |
| 6 cm / 11.30 cm | 0.66       | 0.1  | 0.02     |
| 6 cm / 3 cm     | 1.45       | 0.28 | 0.12     |

**Supplementary Table S4.** Tukey contrast comparison between refuge with different entrance configurations

| Comparison                                      | Odds ratio | SE   | p. value |
|-------------------------------------------------|------------|------|----------|
| continuous opening (base)/ four openings (base) | 0.94       | 0.14 | 0.98     |
| four openings (side)/ four openings (base)      | 0.04       | 0.02 | <.0001   |
| four openings (side)/continuous opening (base)  | 0.05       | 0.02 | <.0001   |
| four openings (top)/ four openings (base)       | 0.1        | 0.03 | <.0001   |
| four openings (top)/continuous opening (base)   | 0.11       | 0.04 | <.0001   |
| four openings (top)/ four openings (side)       | 2.25       | 1.35 | 0.53     |
